# Supplementary material for: Large-scale in-silico statistical mutagenesis analysis sheds light on the deleteriousness landscape of the human proteome
Source: PubMed Central journal article supplement (PMC6242909; doi:10.1038/s41598-018-34959-7), 2018-11-19
Supplement: 41598_2018_34959_MOESM1_ESM.pdf [file 41598_2018_34959_MOESM1_ESM.pdf]

# Large-scale *in-silico* statistical mutagenesis analysis sheds light on the deleteriousness landscape of the human proteome.

## (Supplementary Material)

Daniele Raimondi, Gabriele Orlando, Francesco Tabaro, Tom Lenaerts, Marianne Rooman, Yves Moreau, Wim F. Vranken

## Uniprot annotations

The full list of annotations describing regions of interest in the protein sequence that are available on Uniprot can be found at [http://www.uniprot.org/help/sequence\\_annotation](http://www.uniprot.org/help/sequence_annotation) . To annotate functional sites we used the following four classes (reported from the Uniprot website with the corresponding link to the specific pages):

|                               |                                                                         |
|-------------------------------|-------------------------------------------------------------------------|
| <a href="#">Active site</a>   | Amino acid(s) directly involved in the activity of an enzyme            |
| <a href="#">Metal binding</a> | Binding site for a metal ion                                            |
| <a href="#">Binding site</a>  | Binding site for any chemical group (co-enzyme, prosthetic group, etc.) |
| <a href="#">Site</a>          | Any interesting single amino acid site on the sequence                  |

To annotate Post-translational modifications we used the following classes:

|                                    |                                                                                                                  |
|------------------------------------|------------------------------------------------------------------------------------------------------------------|
| <a href="#">Modified residue</a>   | Modified residues excluding lipids, glycans and protein cross-links                                              |
| <a href="#">Lipidation</a>         | Covalently attached lipid group(s)                                                                               |
| <a href="#">Glycosylation</a>      | Covalently attached glycan group(s)                                                                              |
| <a href="#">Disulfide bond</a>     | Cysteine residues participating in disulfide bonds                                                               |
| <a href="#">Calcium binding</a>    | Position(s) of calcium binding region(s) within the protein                                                      |
| <a href="#">Nucleotide binding</a> | Nucleotide phosphate binding region (ATP-binding, cAMP-binding, cGMP-binding, FAD, FMN, GTP-binding, NAD, NADP.) |

The secondary structure annotations are the following:

|                             |                                                                            |
|-----------------------------|----------------------------------------------------------------------------|
| <a href="#">Helix</a>       | Helical regions within the experimentally determined protein structure     |
| <a href="#">Turn</a>        | Turns within the experimentally determined protein structure               |
| <a href="#">Beta strand</a> | Beta strand regions within the experimentally determined protein structure |

The annotations related to transmembrane proteins are the following:

|                                    |                                                                |
|------------------------------------|----------------------------------------------------------------|
| <a href="#">Topological domain</a> | Location of non-membrane regions of membrane-spanning proteins |
| <a href="#">Transmembrane</a>      | Extent of a membrane-spanning region                           |
| <a href="#">Intramembrane</a>      | Extent of a region located in a membrane without crossing it   |

The annotations related to domain are extracted from:

|                        |                                                  |
|------------------------|--------------------------------------------------|
| <a href="#">Domain</a> | Position and type of each modular protein domain |
|------------------------|--------------------------------------------------|

## DEOGEN2 features description

| Feature                             | Reference                                    | Name |
|-------------------------------------|----------------------------------------------|------|
| PROVEAN score                       | Choi et al, <i>PloS One</i> 2012             | PROV |
| Conservation Index (12,13)          | Calabrese et al., <i>Bioinformatics</i> 2009 | CI   |
| Mutant/wildtype log-odd ratio (12)  | Raimondi et al., <i>Bioinformatics</i> 2016  | LOR  |
| Early Folding predictions           | Raimondi et al., <i>SciRep</i> 2017          | EF   |
| PFAM log-odd score (17)             | Shihab et al., 2013                          | PF   |
| Interaction patches annotation (19) | Meyer et al., <i>Bioinformatics</i> 2013     | INT  |
| RVIS (20)                           | Petrovski et al., <i>PloS Gen.</i> 2013      | RVIS |
| GDI (21)                            | Itan et al., <i>PNAS</i> 2015                | GDI  |
| Recessiveness index (22)            | MacArthur et al., <i>Science</i> 2012        | REC  |
| Gene essentiality (23)              | Georgi et al., <i>Plos Gen.</i> 2013         | ESS  |
| Pathway log-odd score (12,13)       | Calabrese et al., <i>Bioinformatics</i> 2009 | PATH |

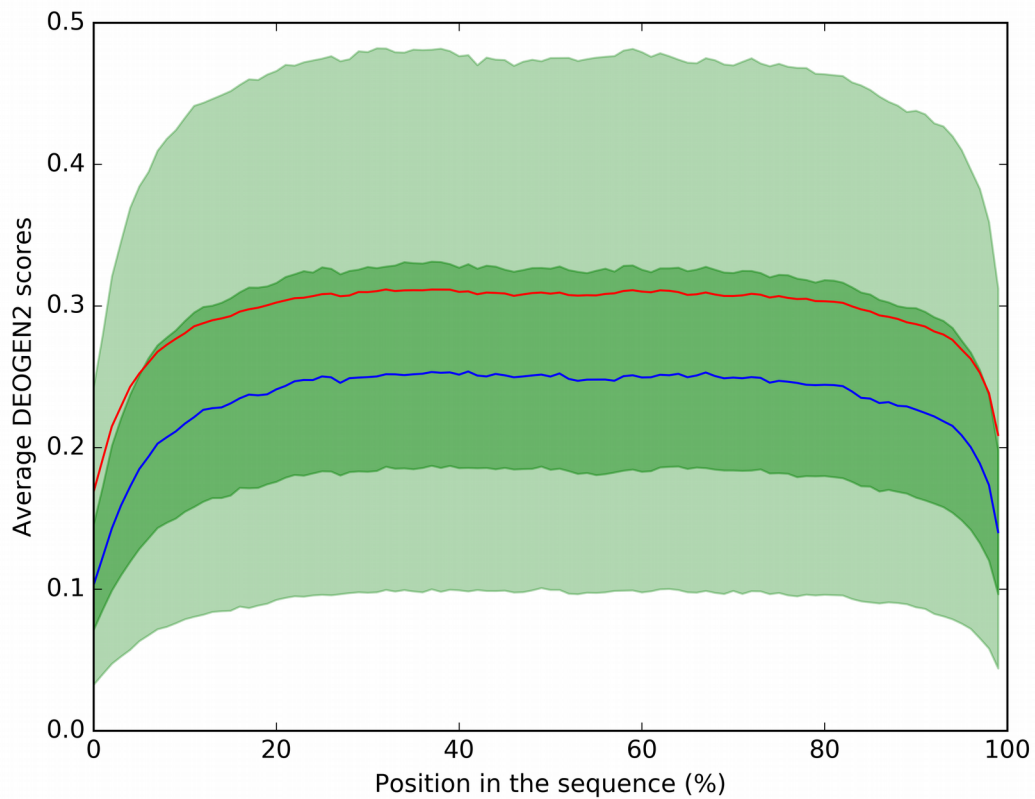

## Supplementary Figures

**Fig. S1:** Distributions of the DEOGEN2 scores, averaged for each position in the sequence for every protein in SP17. The sequence position is represented as percentage of the protein length. The red line indicates the mean of the distribution and the blue line the median. The dark green region indicates the 40-60 quartiles region and the light green one corresponds to the 25-75 quartiles.

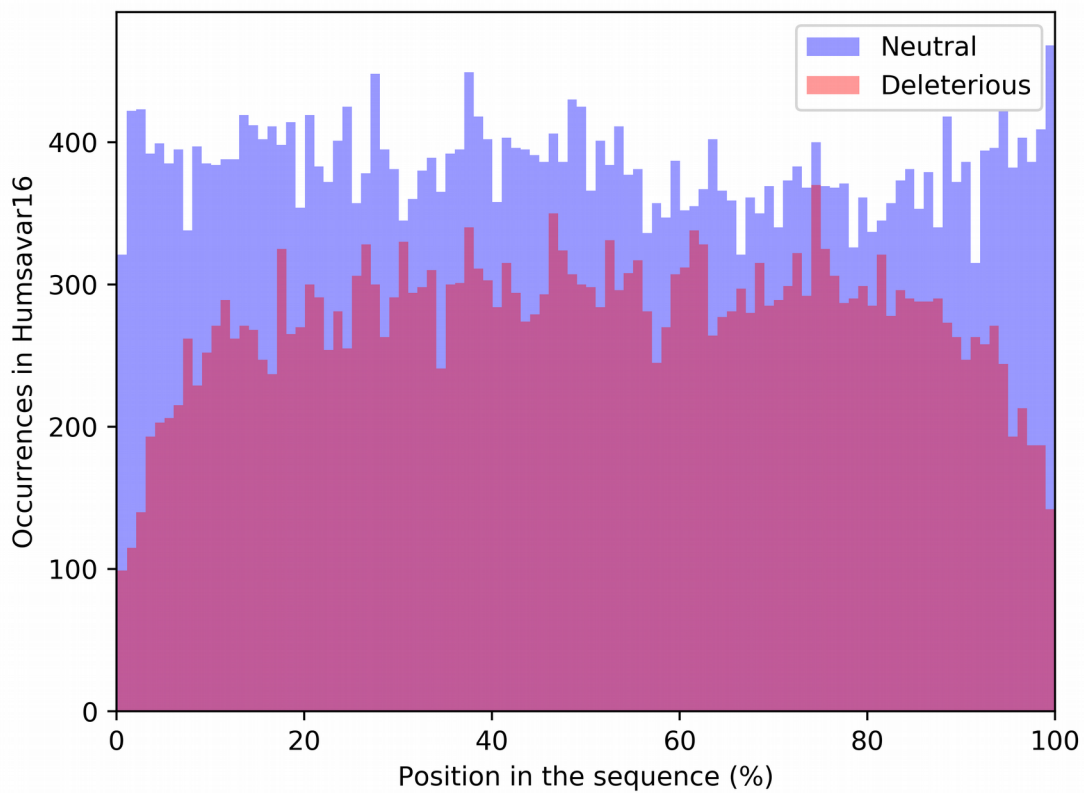

**Fig. S2:** Plot showing the distribution of the deleterious and neutral Humsavar 2016 annotations with respect to their position in the protein sequence.



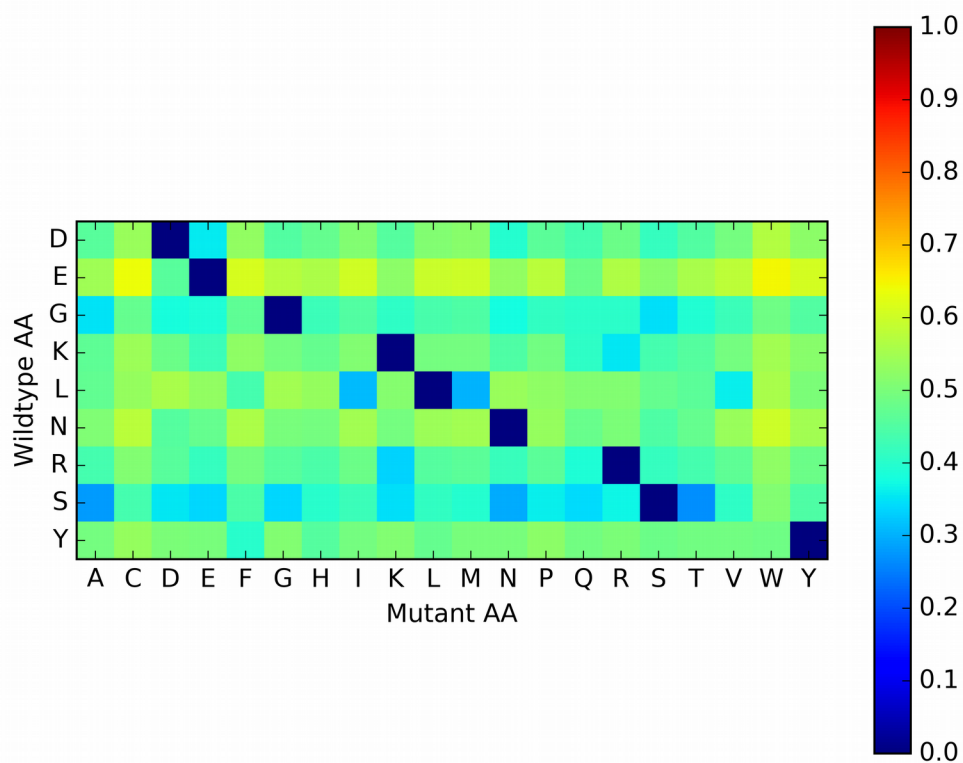

**Fig. S3:** Matrix showing the average deleteriousness prediction scores for variants mutating a wildtype residue (Y axis) into one of the possible 20 amino acids (X axis) when the wildtype residue is involved in a binding site. (see Suppl. Mat. Uniprot Annotations details)

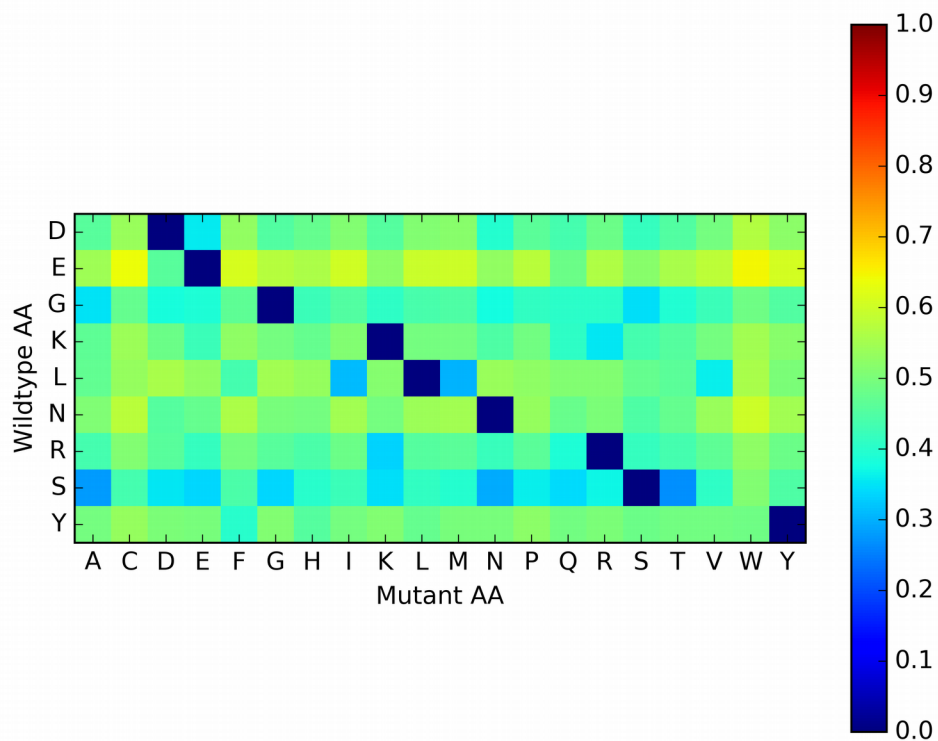

**Fig. S4:** Matrix showing the average deleteriousness prediction scores for variants mutating a wildtype residue (Y axis) into one of the possible 20 amino acids (X axis) when the wildtype residue is involved in a generic “site” annotation from Uniprot (see Suppl. Mat. Uniprot Annotations details).

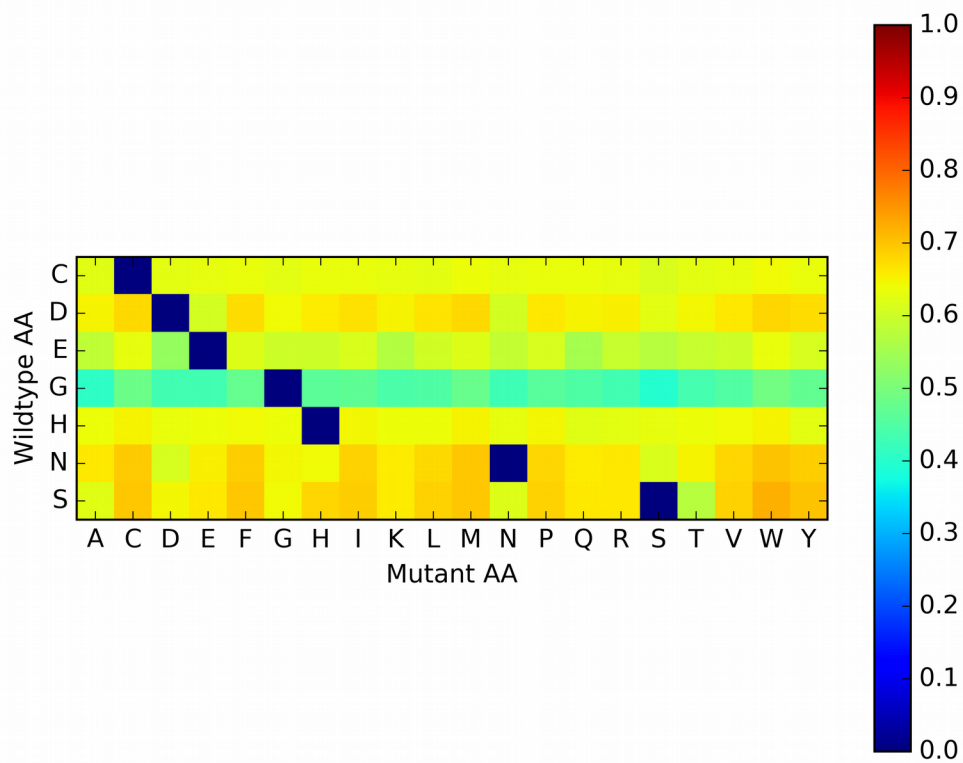

**Fig. S5:** Matrix showing the average deleteriousness prediction scores for variants mutating a wildtype residue (Y axis) into one of the possible 20 amino acids (X axis) when the wildtype residue is involved in a metal binding site (see Suppl. Mat. Uniprot Annotations details).

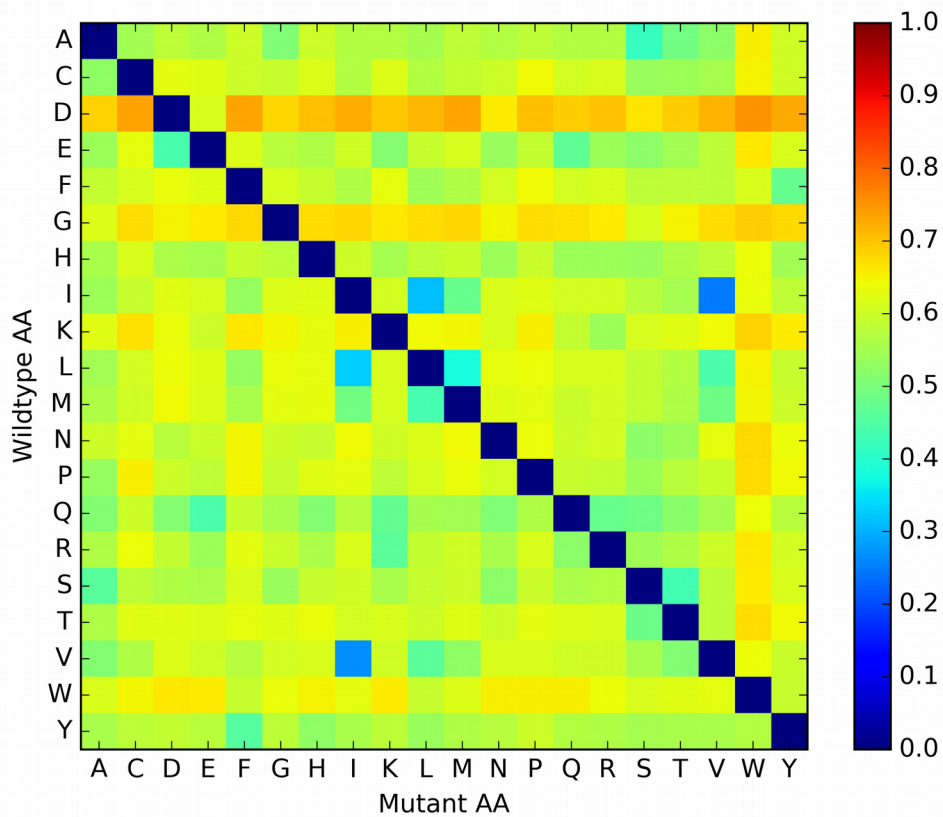

**Fig. S6:** Matrix showing the average deleteriousness prediction scores for variants mutating a wildtype residue (Y axis) into one of the possible 20 amino acids (X axis) when the wildtype residue is involved in a nucleotide binding site (see Suppl. Mat. Uniprot Annotations details).

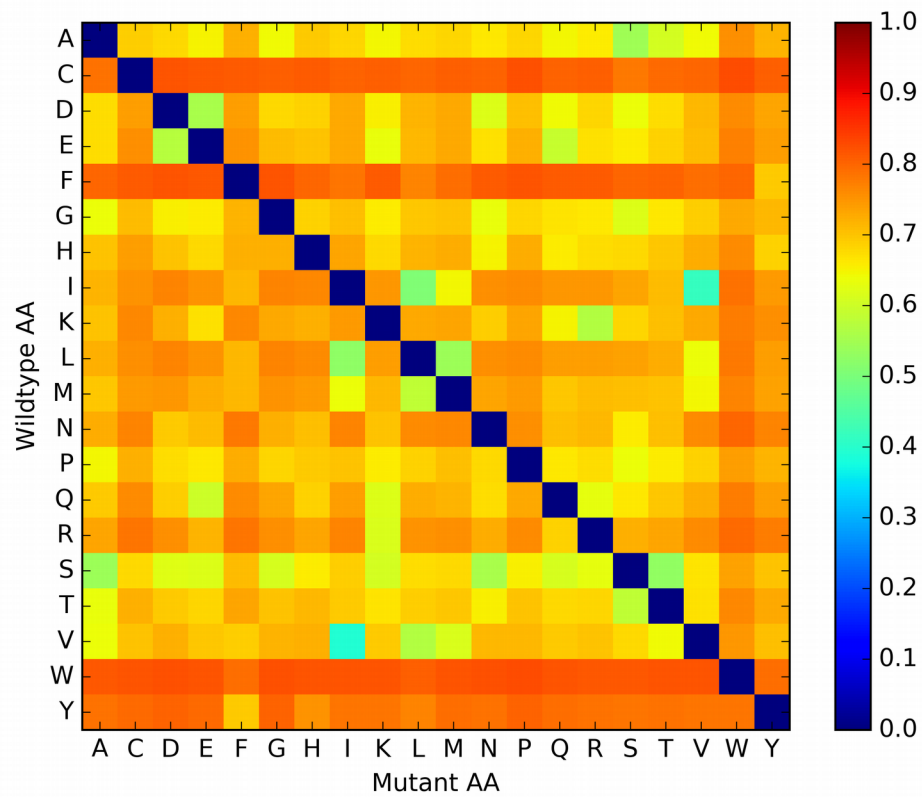

**Fig. S7:** Matrix showing the average deleteriousness prediction scores for variants mutating a wildtype residue (Y axis) into one of the possible 20 amino acids (X axis) when the wildtype residue is involved in a DNA binding site (see Suppl. Mat. Uniprot Annotations details).



**Fig. S8:** Matrix showing the average deleteriousness prediction scores for variants mutating a wildtype residue (Y axis) into one of the possible 20 amino acids (X axis) when the wildtype residue is involved in an active site (see Suppl. Mat. Uniprot Annotations details).

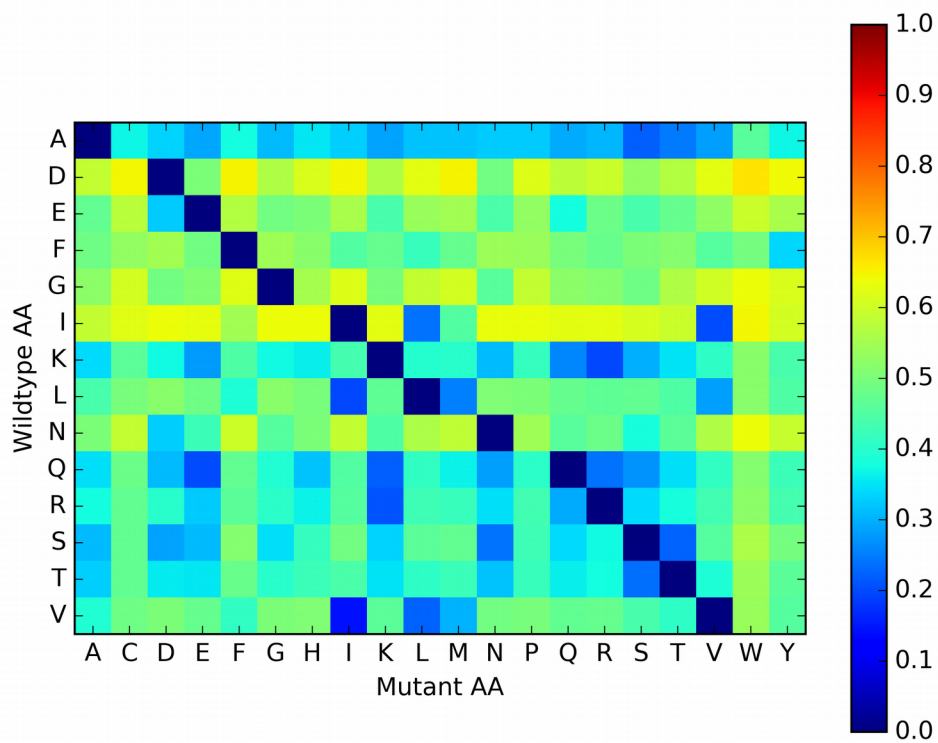

**Fig. S9:** Matrix showing the average deleteriousness prediction scores for variants mutating a wildtype residue (Y axis) into one of the possible 20 amino acids (X axis) when the wildtype residue is involved in a DNA binding site (see Suppl. Mat. Uniprot Annotations details).

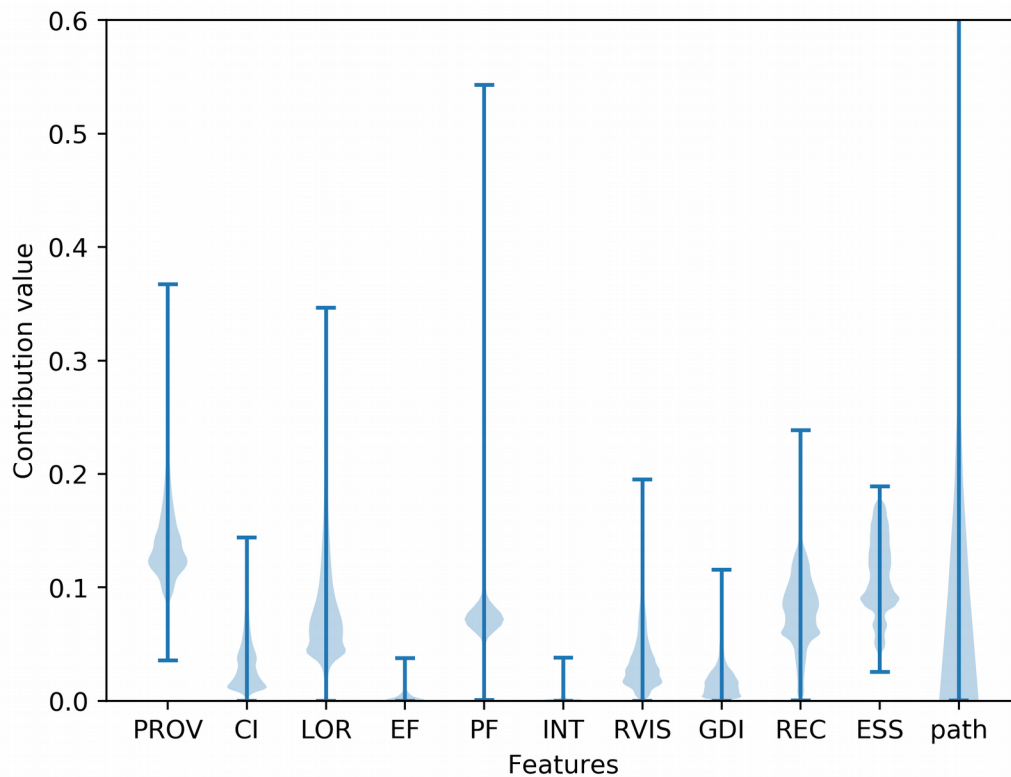

**Fig. S10:** Violin plot showing the contributions of the features used within DEOGEN2. PROV, CI and LOR are evolutionary-related features computed from Multiple Sequence Alignments. EF relates with the probability for the target residue to be involved in the earliest stages of protein folding. PF is the PFAM-domain likelihood of hosting deleterious variants, INT indicates if the variant occurs on an interaction patch. RVIS, GDI, REC and ESS contextualize the relevance of the gene for the organism from different points of view. PATH indicates the likelihood of the affected pathways to be involved in diseases. A full explanation can be found in REFdeogen2 and in Suppl. Material.



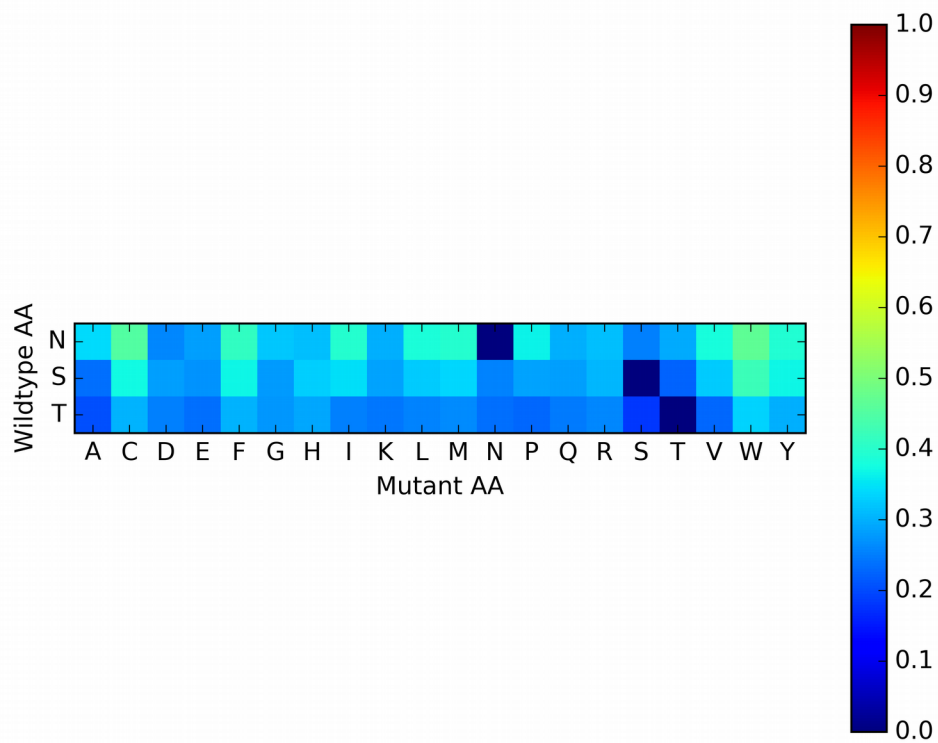

**Fig. S11:** Matrix showing the average deleteriousness prediction scores for variants mutating a wildtype residue (Y axis) into one of the possible 20 amino acids (X axis) when the wildtype is a glycosylated residue (see Suppl. Mat. Uniprot Annotations details).

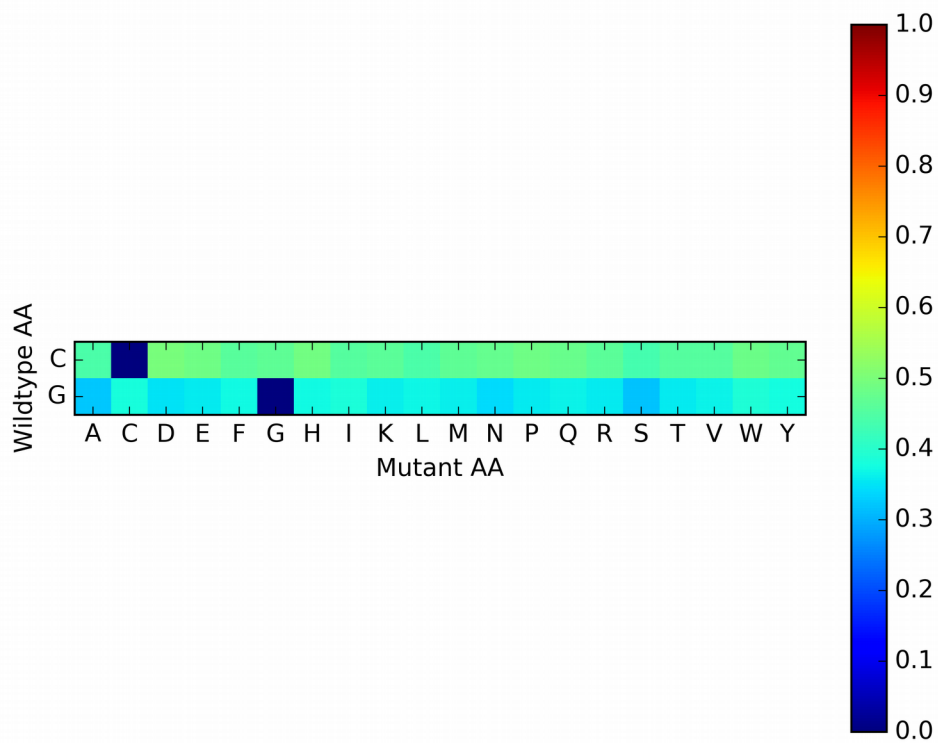

**Fig. S12:** Matrix showing the average deleteriousness prediction scores for variants mutating a wildtype residue (Y axis) into one of the possible 20 amino acids (X axis) when the wildtype is a lipidated residue (see Suppl. Mat. Uniprot Annotations details).

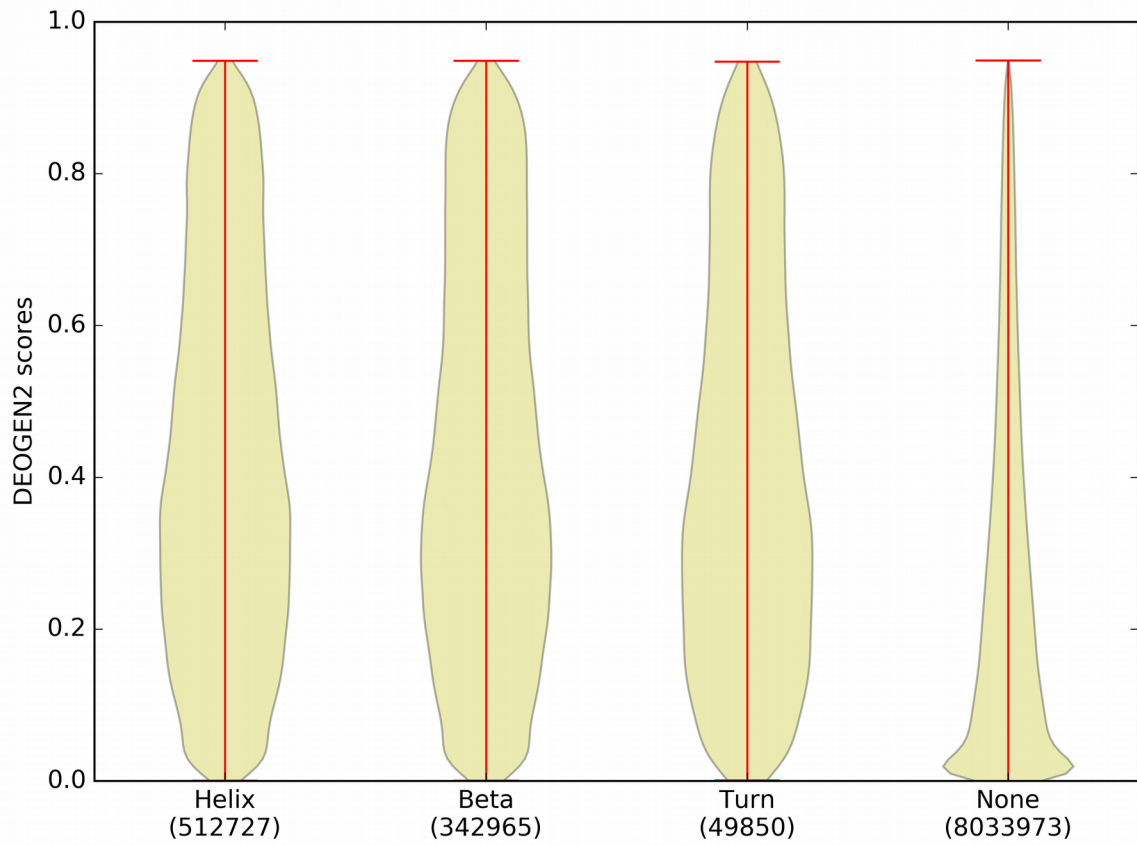

**Fig. S13:** Violin plots showing the distribution of the DEOGEN2 scores for different secondary structure elements in SP17.

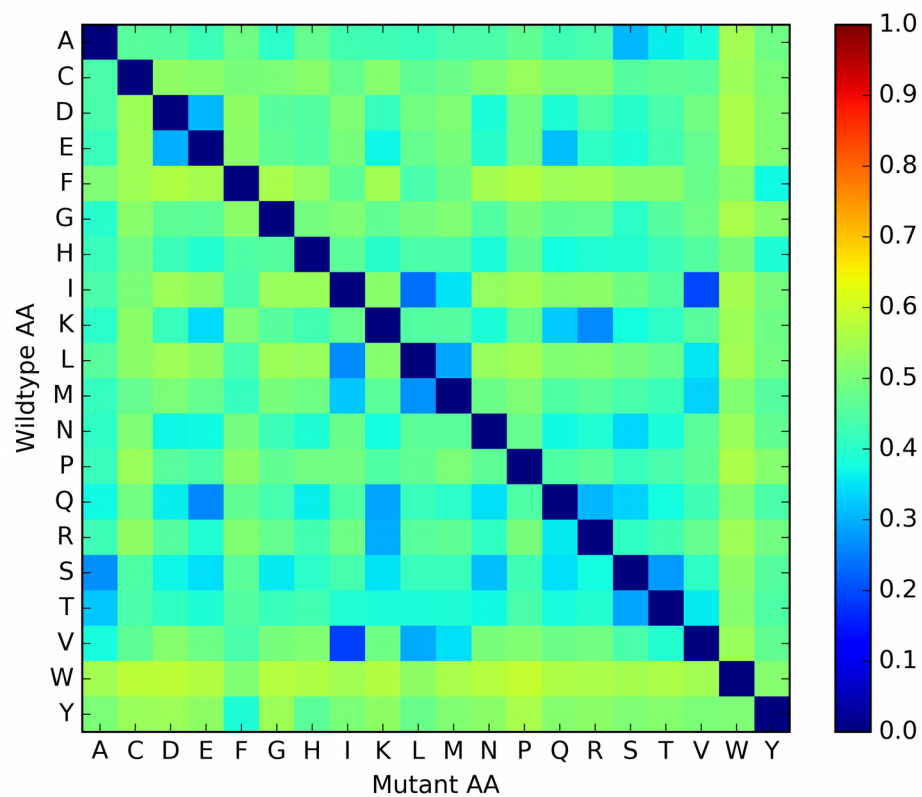

**Fig. S14:** Matrix showing the average deleteriousness prediction scores for variants mutating a wildtype residue (Y axis) into one of the possible 20 amino acids (X axis) when the wildtype part of an helical secondary structure element.

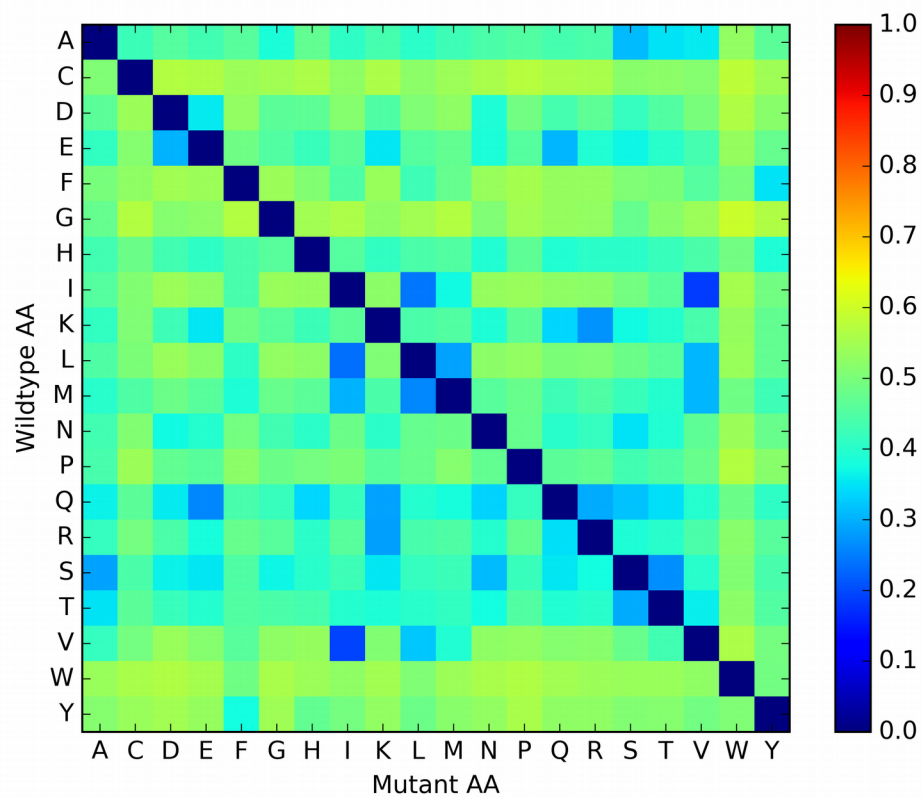

**Fig. S15:** Matrix showing the average deleteriousness prediction scores for variants mutating a wildtype residue (Y axis) into one of the possible 20 amino acids (X axis) when the wildtype part of an beta-sheet secondary structure element.

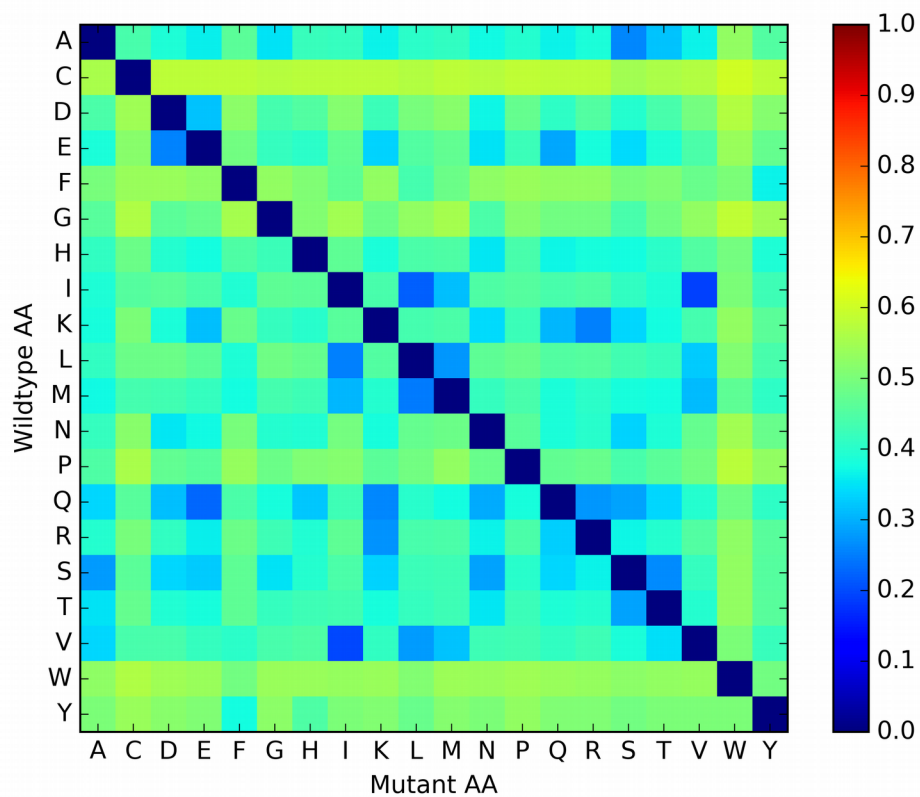

**Fig. S16:** Matrix showing the average deleteriousness prediction scores for variants mutating a wildtype residue (Y axis) into one of the possible 20 amino acids (X axis) when the wildtype part of an hydrogen-bonded turn secondary structure element.

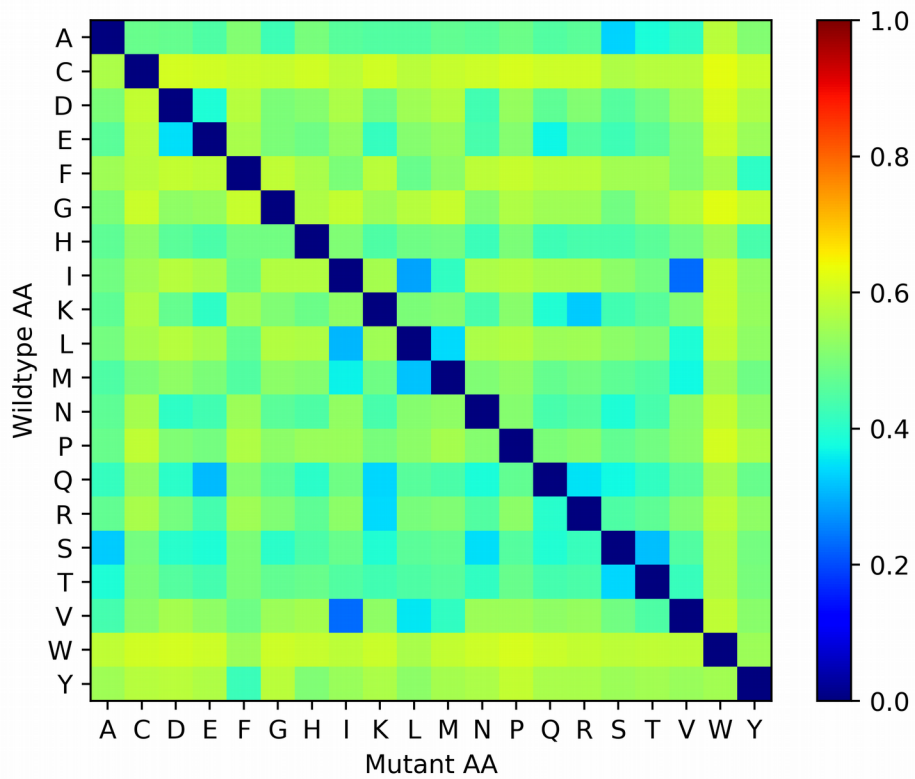

**Fig. S17:** Matrix showing the average deleteriousness prediction scores for variants mutating a wildtype residue (Y axis) into one of the possible 20 amino acids (X axis) when the wildtype part of an interaction patch annotated from Instruct database.

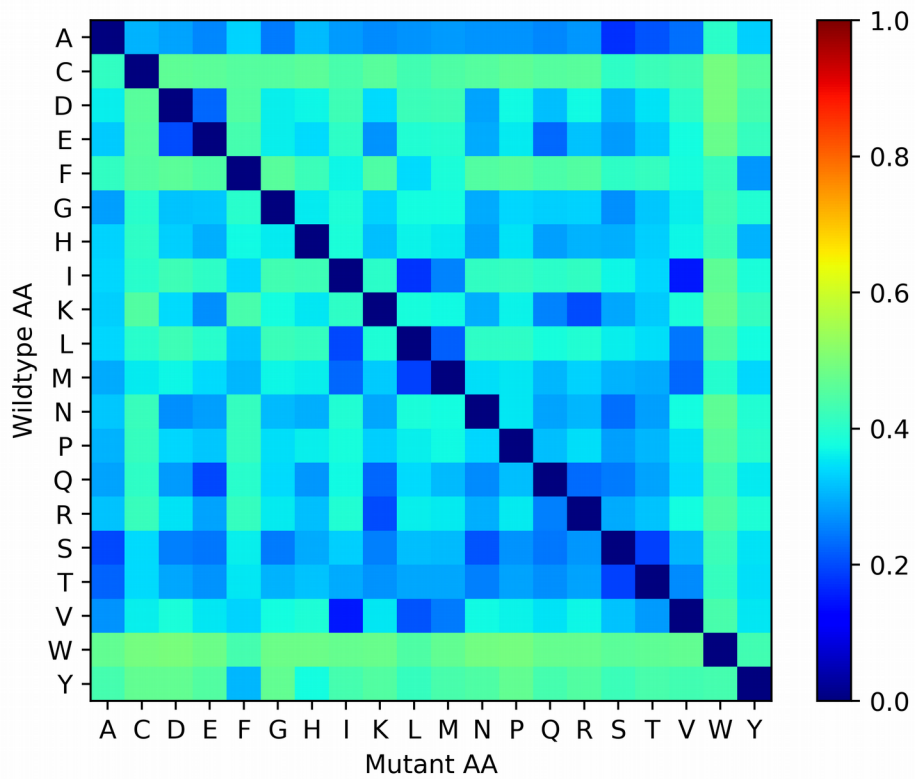

**Fig. S18:** Matrix showing the average deleteriousness prediction scores for variants mutating a wildtype residue (Y axis) into one of the possible 20 amino acids (X axis) when the wildtype is not part of an interaction patch annotated from Instruct database.



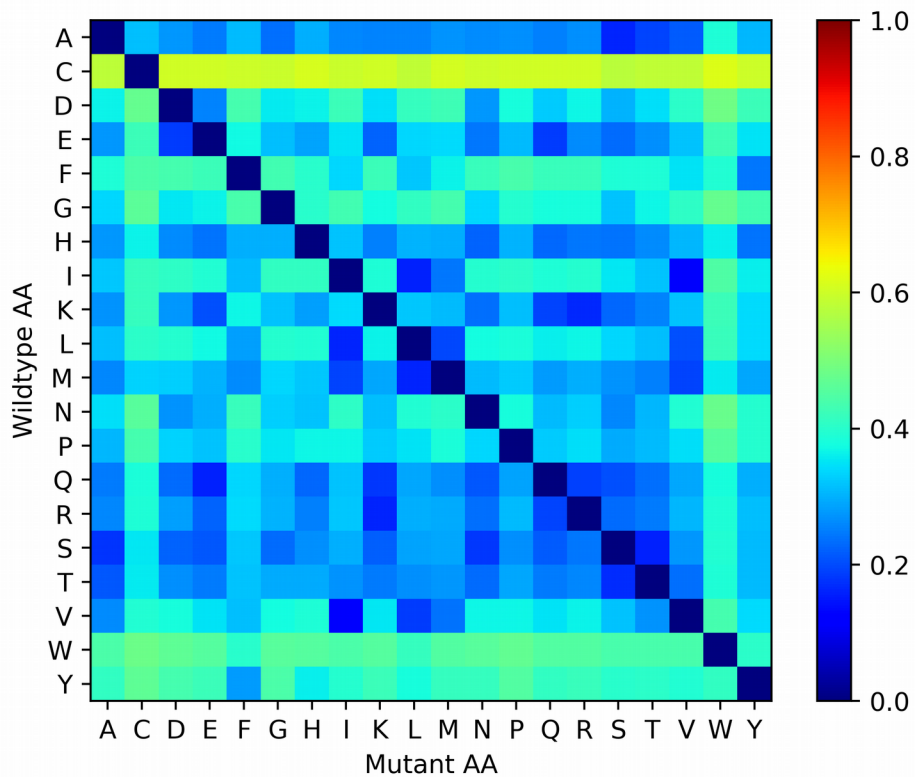

**Fig. S19:** Matrix showing the average deleteriousness prediction scores for variants mutating a wildtype residue (Y axis) into one of the possible 20 amino acids (X axis) when the wildtype is part of an extracellular region of a membrane protein.

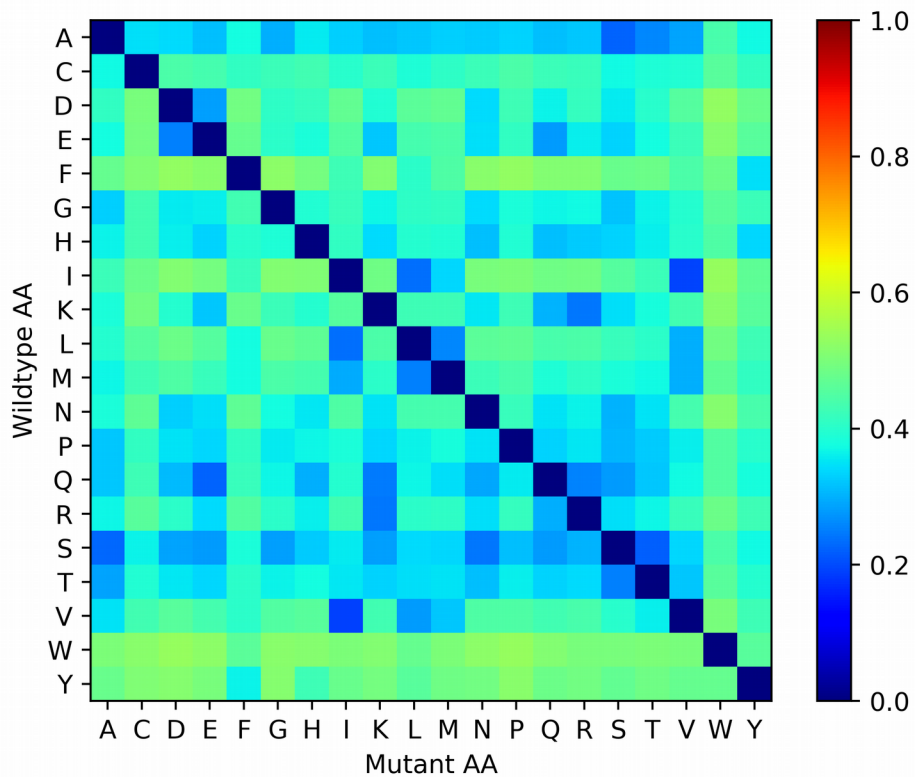

**Fig. S20:** Matrix showing the average deleteriousness prediction scores for variants mutating a wildtype residue (Y axis) into one of the possible 20 amino acids (X axis) when the wildtype is part of a cytoplasmic region of a membrane protein.

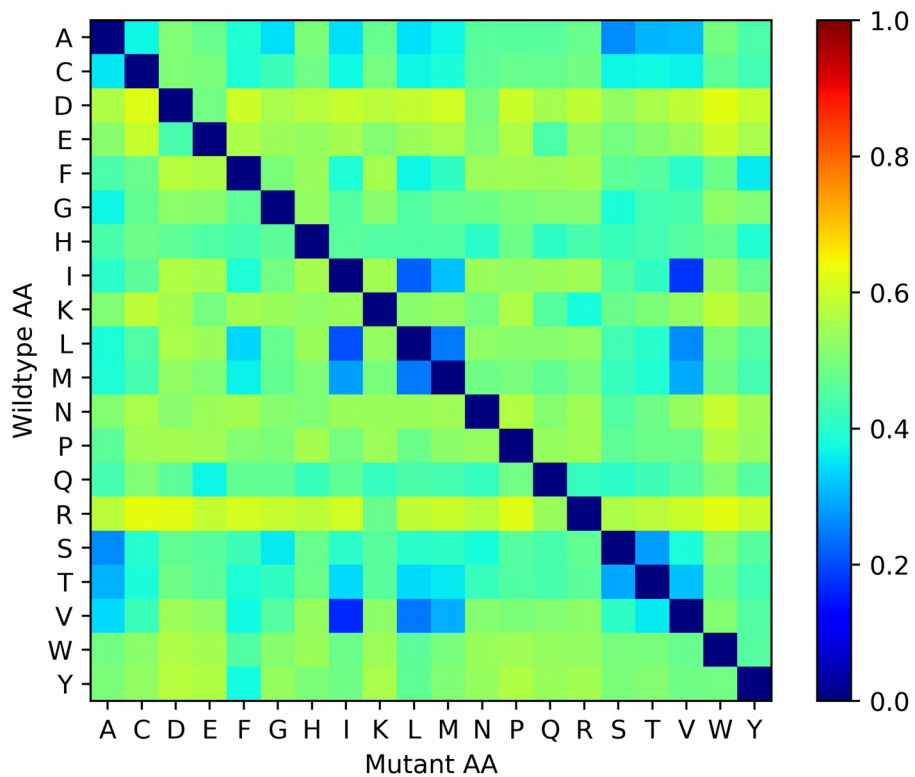

**Fig. S21:** Matrix showing the average deleteriousness prediction scores for variants mutating a wildtype residue (Y axis) into one of the possible 20 amino acids (X axis) when the wildtype is part of an transmembrane region of a membrane protein.

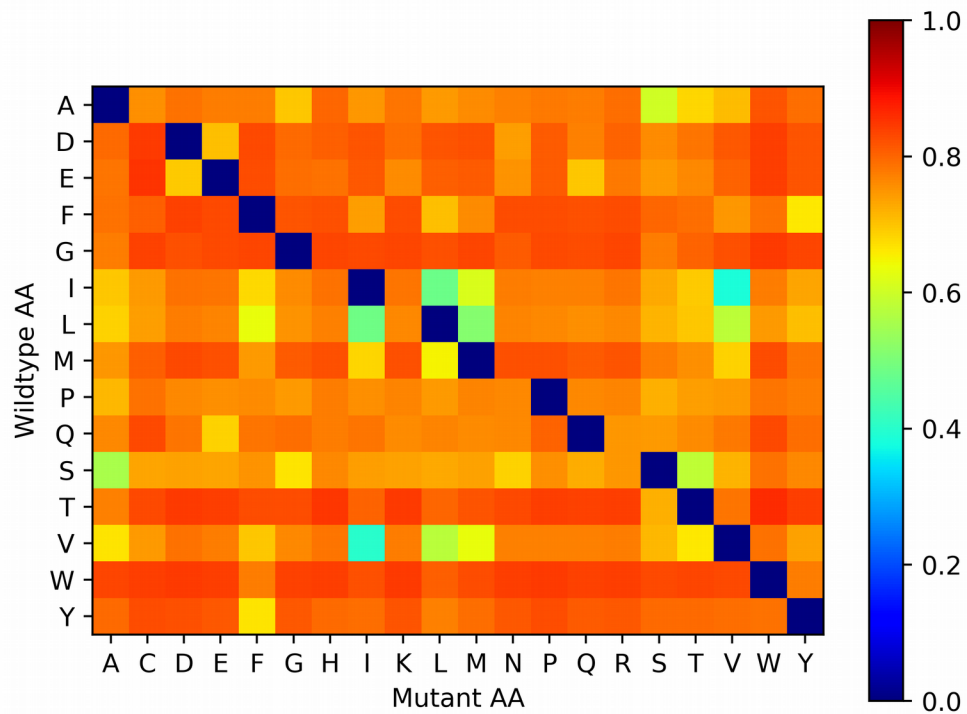

**Fig. S22:** Matrix showing the average deleteriousness prediction scores for variants mutating a wildtype residue (Y axis) into one of the possible 20 amino acids (X axis) when the wildtype is part of an extracellular region of a membrane protein.



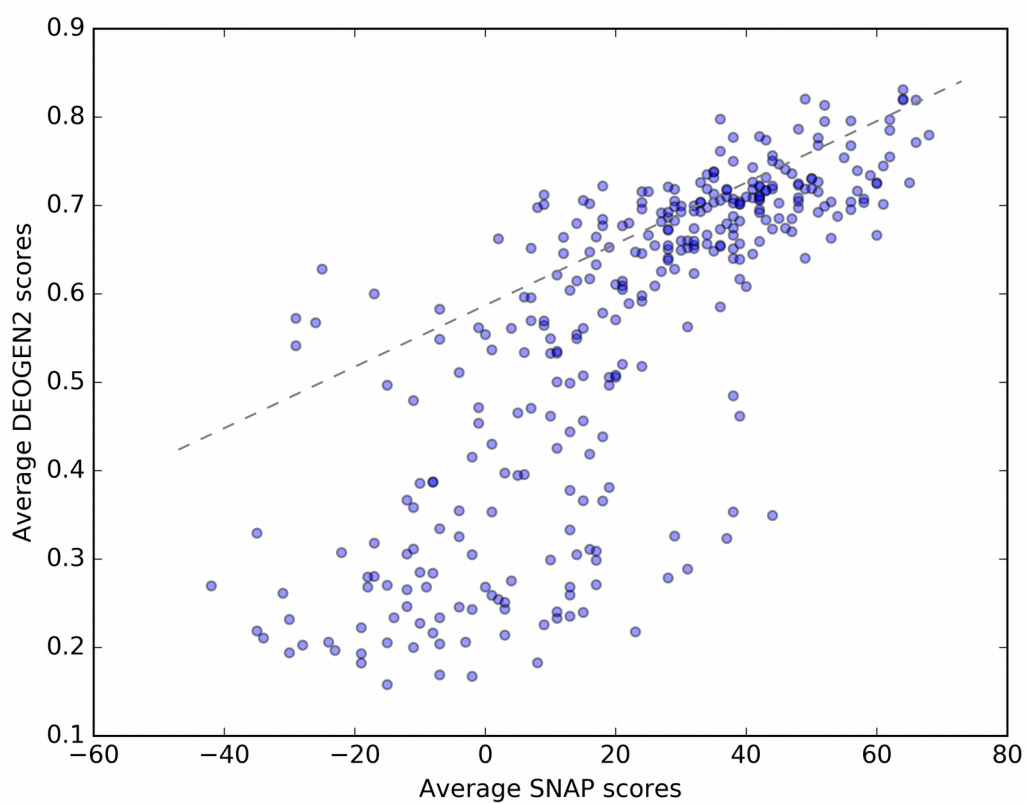

**Fig. s24:** Scatter plot showing the correlation between SNAP and DEOGEN2 predictions on the 159 experimentally annotated variants on the Melanocortin receptor 4 used as blind-test set.

# Human Glucokinase protein (P35557)

## Independent variants

The following text contains the list of the 24 variants on which we blind tested DEOGEN2 on P35557. The format of each row is the following:

*DEOGEN2 predicted score; residue position; Wildtype → mutant ; effect of the mutation or involvement in MODY2/HHF3 diseases.*

0.959065 225 I → M: Highly decreases glucokinase activity.

0.917726 434 C → F in MODY2;

0.607816 91 V → L in HHF3; increased glucokinase activity; increased affinity for glucose.

0.771272 217 D → N: Mildly increases glucokinase activity.

0.972777 191 R → W in MODY2.

0.971649 256 E → A: Inactive enzyme.

0.880906 315 L → F in MODY2;

0.596694 248 E → K: Highly decreases glucokinase activity.

0.702569 99 W → C in HHF3; increased glucokinase activity; increased affinity for glucose; increased affinity for ATP.

0.978817 68 G → D in MODY2;

0.933298 378 A → T in MODY2.

0.615586 447 R → Q in MODY2.

0.984777 152 F → L in MODY2;

0.946655 441 S → W in MODY2; decreased affinity for glucose. 2

0.90115 177 E → K: Small change in activity.

0.941721 188 A → V in MODY2.

0.924634 202 M → R in MODY2;

0.663921 65 T → I in HHF3; decreased glucokinase activity; increased affinity for glucose; unchanged affinity for ATP.

0.969764 231 N → H in MODY2;

0.868476 43 R → H in MODY2;

0.819254 442 E → K in HHF3; increased affinity for glucose. 2

0.909992 414 K → A: Small change in activity.

0.916139 223 G → S in MODY2.

0.946551 129 C → Y in MODY2.
